# Supplementary material for: Adapting to a Warmer Ocean—Seasonal Shift of Baleen Whale Movements over Three Decades
Source: PLOS journal article supplement (doi:10.1371/journal.pone.0121374), 2015-03-18

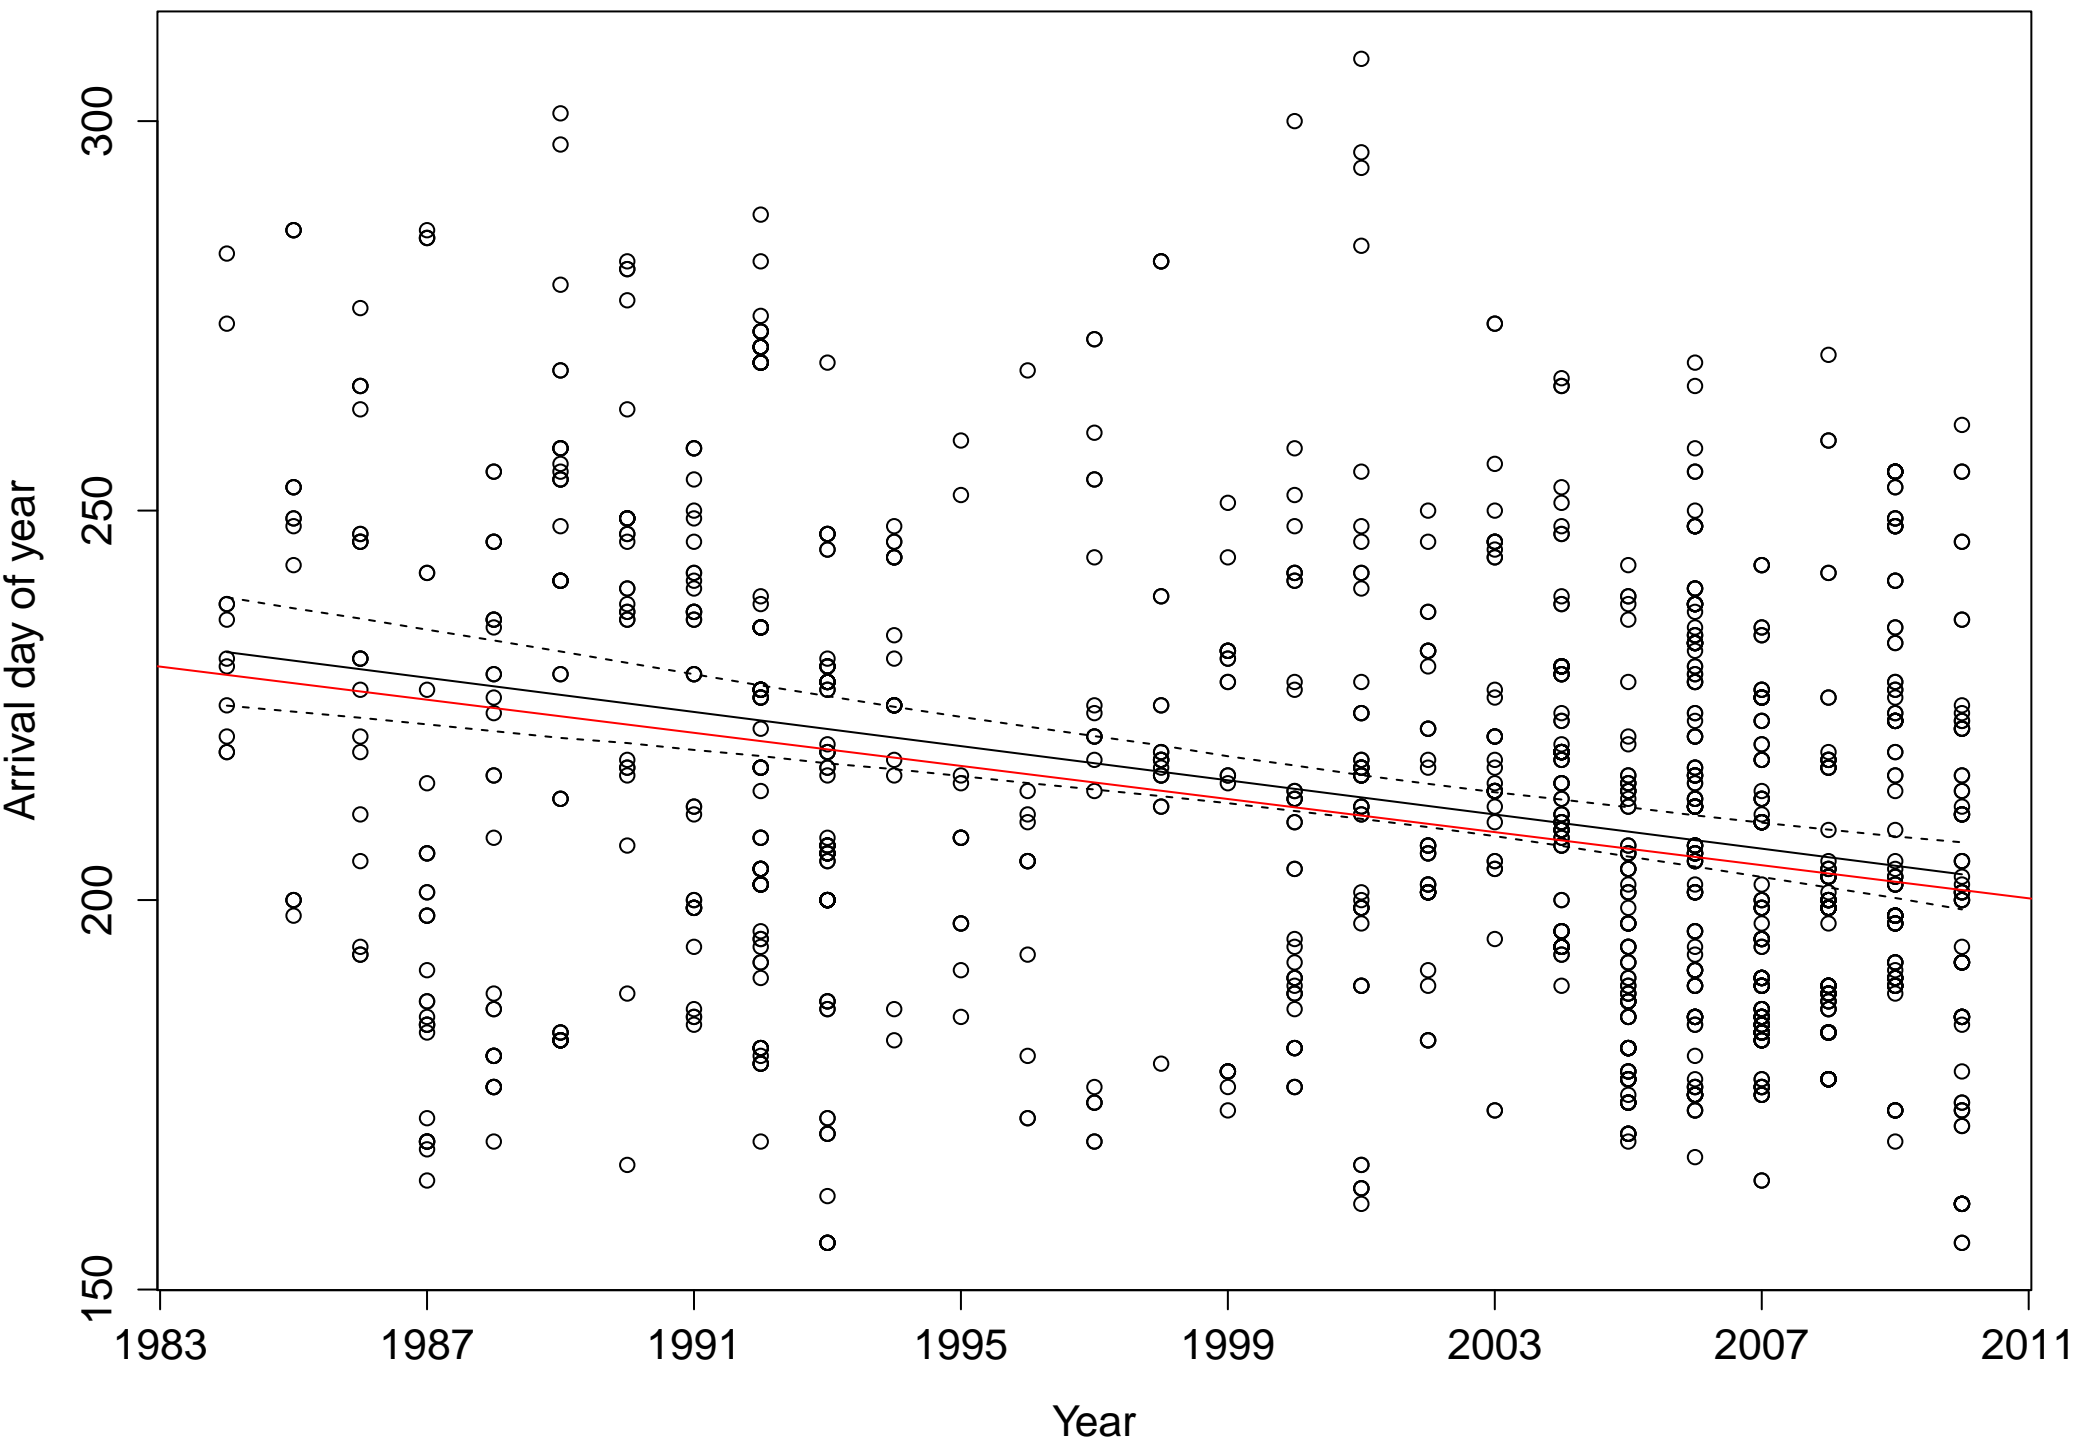

Supplement: S1 (10.1371/journal.pone.0121374.s001) [file journal.pone.0121374.s001]
